# Supplementary material
Source: MDPI journal article supplement (https://www.mdpi.com/2072-4292/8/8/653)

# Supplementary Materials: Airborne Lidar Estimation of Aboveground Forest Biomass in the Absence of Field Inventory

António Ferraz, Sassan Saatchi, Clément Mallet, Stéphane Jacquemoud, Gil Gonçalves, Carlos Alberto Silva, Paula Soares, Margarida Tomé and Luisa Pereira

**Table S1.** Metrics derived from the lidar point cloud for the establishment of the aboveground biomass (AGB) regression models [1].

| Variable | Description                                          |
|----------|------------------------------------------------------|
| hmin     | Height minimum                                       |
| hmax     | Height maximum                                       |
| hmean    | Height mean                                          |
| hmad     | Height median absolute deviation                     |
| hsd      | Height standard deviation                            |
| hskew    | Height skewness                                      |
| hkurt    | Height kurtosis                                      |
| hcv      | Height coefficient of variation                      |
| hmode    | Height mode                                          |
| h01      | Height 1st percentile                                |
| h05      | Height 5th percentile                                |
| h10      | Height 10th percentile                               |
| h15      | Height 15th percentile                               |
| h20      | Height 20th percentile                               |
| h25      | Height 25th percentile                               |
| h30      | Height 30th percentile                               |
| h35      | Height 35th percentile                               |
| h40      | Height 40th percentile                               |
| h45      | Height 45th percentile                               |
| h50      | Height 50th percentile                               |
| h55      | Height 55th percentile                               |
| h60      | Height 60th percentile                               |
| h65      | Height 65th percentile                               |
| h70      | Height 70th percentile                               |
| h75      | Height 75th percentile                               |
| h80      | Height 80th percentile                               |
| h90      | Height 90th percentile                               |
| h95      | Height 95th percentile                               |
| h99      | Height 99th percentile                               |
| cr       | Canopy relief ratio = $(hmean - hmin)/(hmax - hmin)$ |
| cov      | Canopy cover (percentage of returns above 1.30 m)    |

**Table S2.** Matrix of Pearson's correlation coefficients (r) or the lidar metrics selected to establish the AGB model. The meanings of the acronyms are provided in Table S1.

|       | hmode | hcv   | hkurt | h05  | h99  | cr   | cov  |
|-------|-------|-------|-------|------|------|------|------|
| hmode | 1.00  |       |       |      |      |      |      |
| hcv   | −0.31 | 1.00  |       |      |      |      |      |
| hkurt | 0.16  | −0.28 | 1.00  |      |      |      |      |
| h05   | 0.59  | −0.5  | −0.5  | 1.00 |      |      |      |
| h99   | 0.58  | 0.3   | 0.3   | 0.37 | 1.00 |      |      |
| cr    | 0.62  | −0.47 | −0.47 | 0.63 | 0.55 | 1.00 |      |
| cov   | 0.38  | 0.1   | 0.1   | 0.28 | 0.55 | 0.15 | 1.00 |

**Table S3.** Matrix of Pearson's correlation coefficients (r) or the lidar metrics selected to establish the AGB model without taking into account Forest Plot #12 (see the text for more details).

|       | hmode | hcv   | hkurt | h05  | h99  | cr   | cov  |
|-------|-------|-------|-------|------|------|------|------|
| hmode | 1.00  |       |       |      |      |      |      |
| hcv   | −0.39 | 1.00  |       |      |      |      |      |
| hkurt | 0.22  | −0.27 | 1.00  |      |      |      |      |
| h05   | 0.62  | −0.5  | −0.15 | 1.00 |      |      |      |
| h99   | 0.51  | 0.29  | −0.12 | 0.38 | 1.00 |      |      |
| cr    | 0.65  | −0.48 | −0.11 | 0.63 | 0.6  | 1.00 |      |
| cov   | 0.22  | 0.05  | 0.24  | 0.31 | 0.47 | 0.13 | 1.00 |

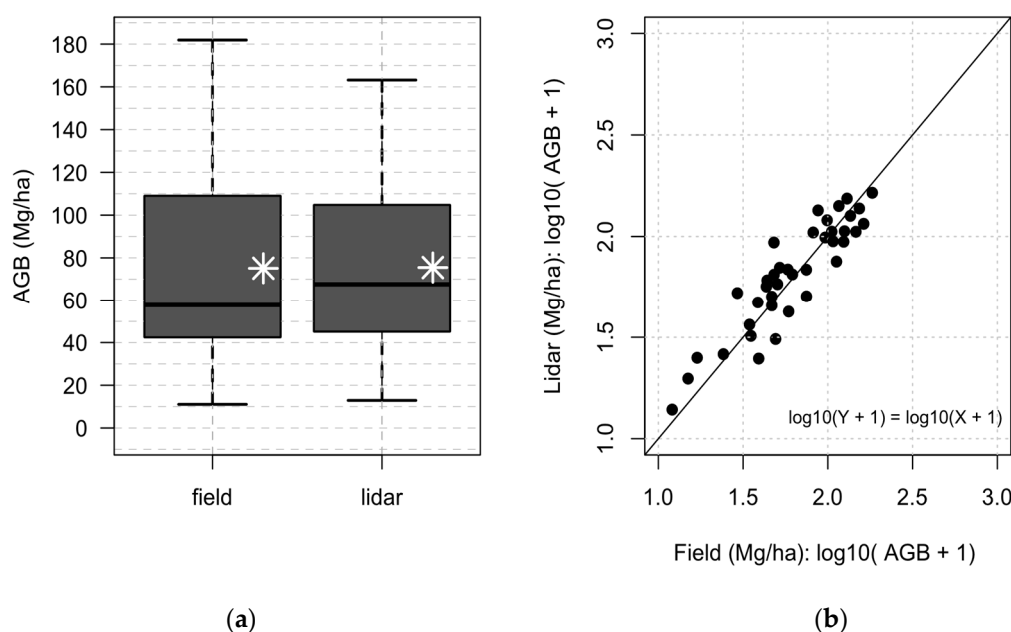**Figure S1.** Result for AGB estimation at the forest plot level using the AGB regression model approach without taking into account Forest Plot #12. (a) Box-and-whisker diagram (see Figure 3 for details) and (b) a scatter plot of field- versus lidar-derived AGB used to calculate the parameters show in the row denoted by forest plot\*\* of Table 2. A log-log scale is used to compare to Figures 3–5.

## References

- McGaughey, R. *FUSION/LDV: Software for LIDAR Data Analysis and Visualization*; US Department of Agriculture, Forest Service, Pacific Northwest Research Station: Seattle, WA, USA, 2015; p. 182.

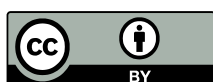

Supplement: s1 [file s1]
